# Supplementary material for: Neural Networks of the Mouse Primary Visceromotor Cortex
Source: Research Square preprint supplement (doi:10.21203/rs.3.rs-4125909/v1), 2025-04-28

Supplementary Video, screenshots showing putative synapses that DP axonal terminals innervate CRH neurons in PVH

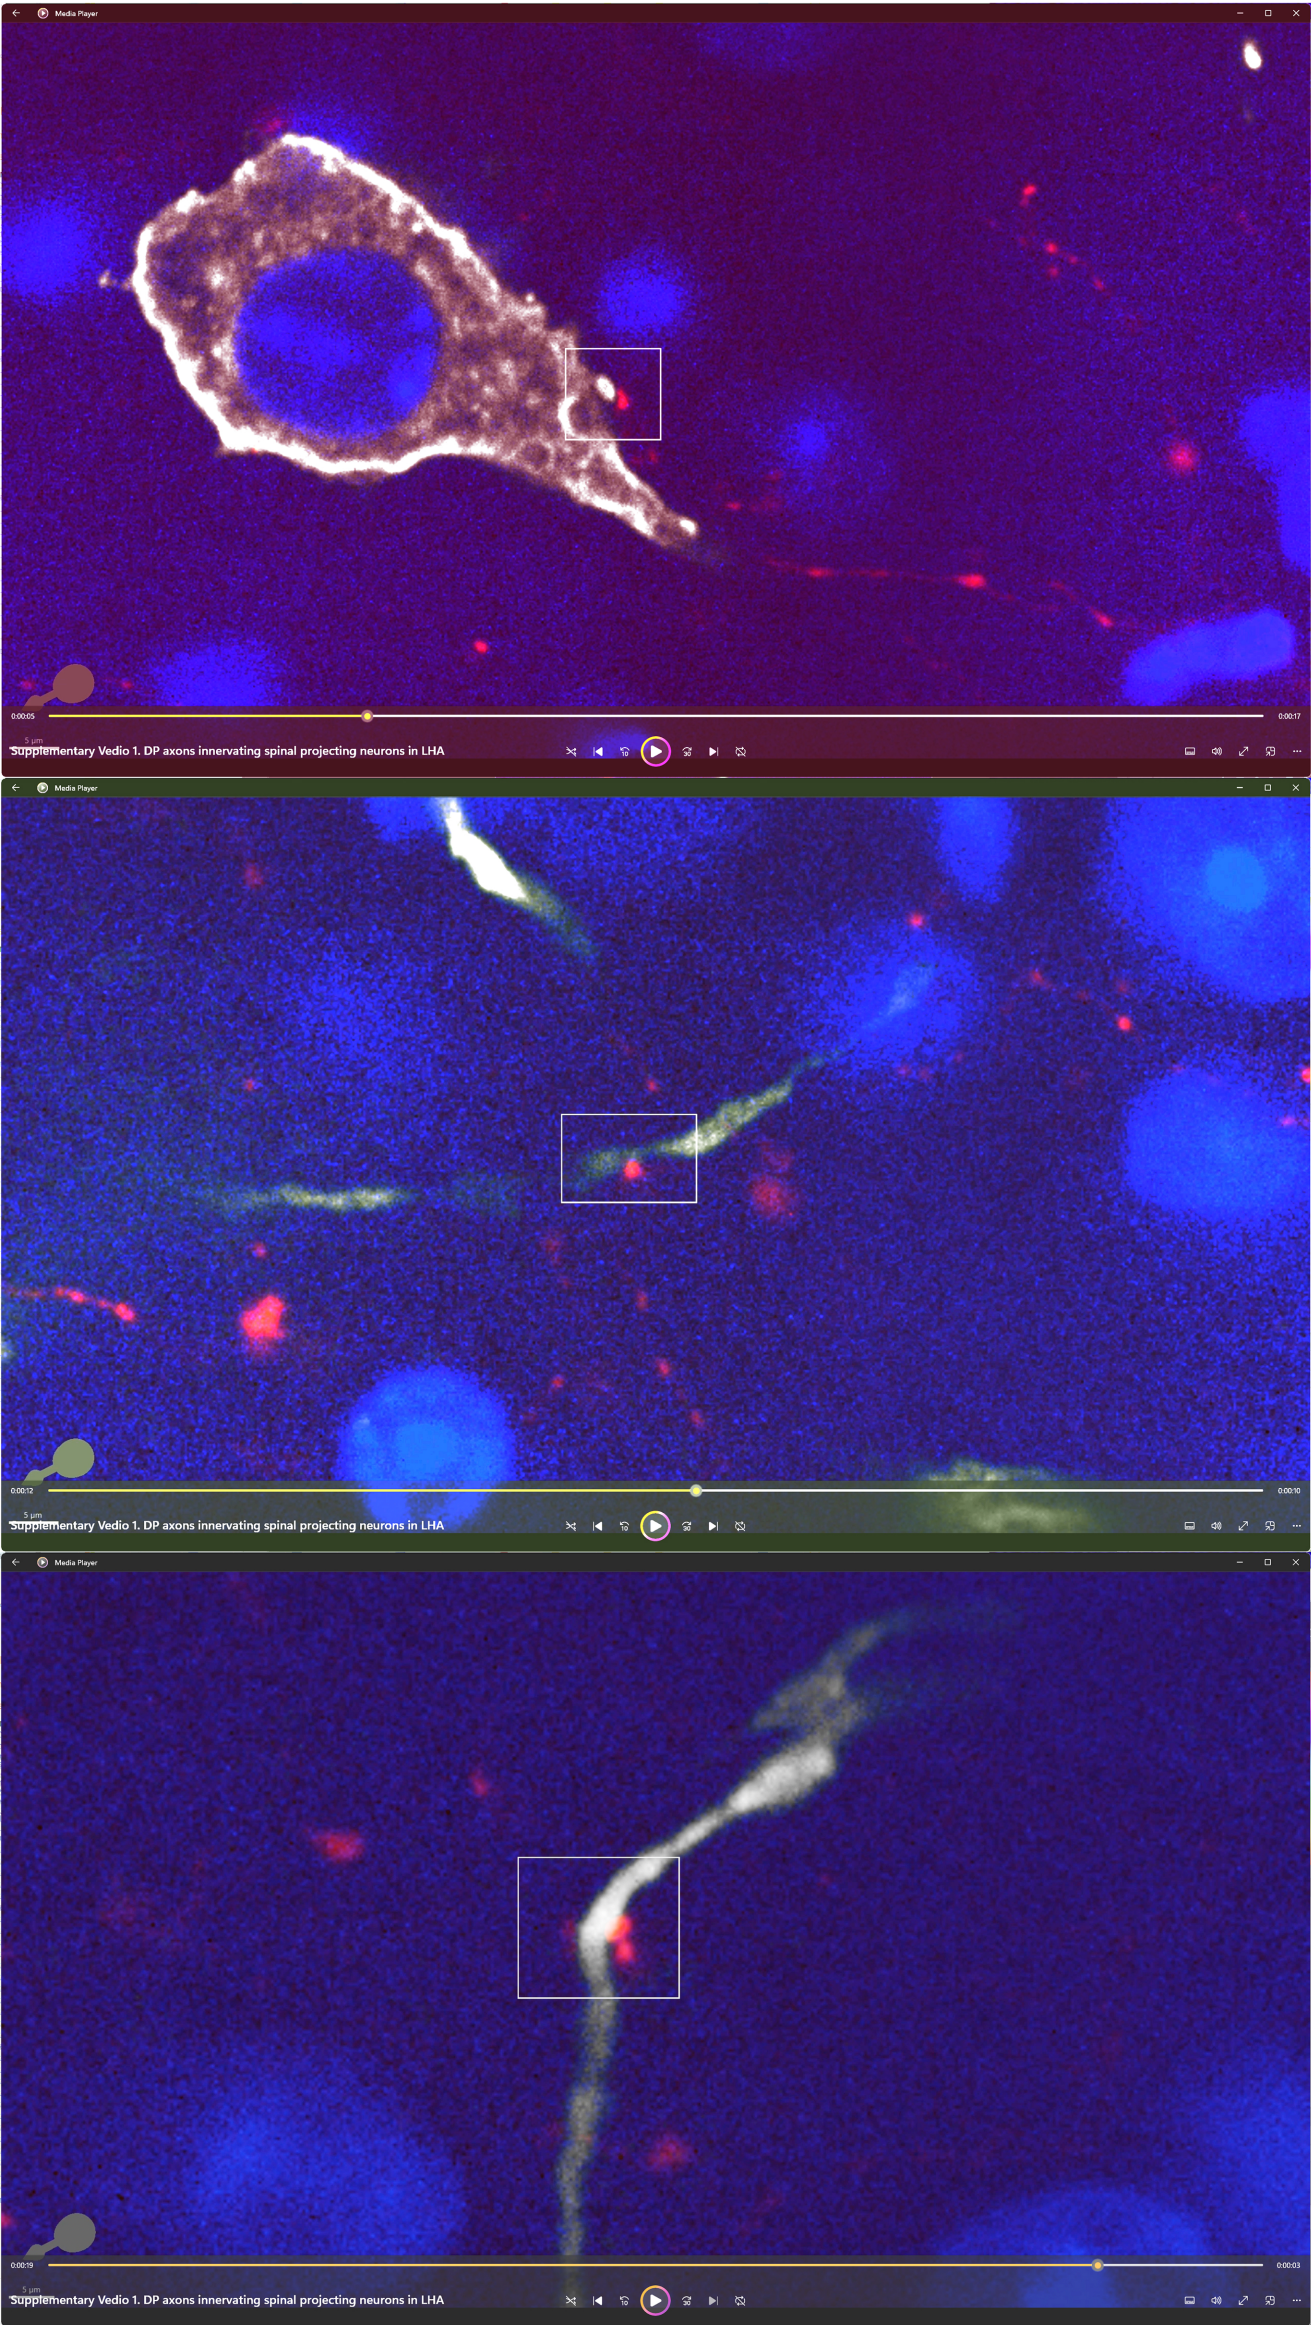

Supplement: Supplementary file 1 [file aa013c588b88c428980d0deb.pdf]
