# Supplementary material for: Neural Networks of the Mouse Primary Visceromotor Cortex
Source: Research Square preprint supplement (doi:10.21203/rs.3.rs-4125909/v1), 2025-04-28
Supplement: Supplementary file 1 [file bfcae883aea13037309c7d2d.xlsx]

## Sheet: Sheet1
	acronym	name
	grey	Basic cell groups and regions
	CTX	Cerebral cortex
	CTXpl	Cortical plate
	Isocortex	Isocortex
	MOp	Primary somatomotor areas
	MOs	Secondary motor area
	MOs-fef	Secondary motor area, frontal eye field
	SS	Somatosensory areas
	SSp	Primary somatosensory area
	VISC	Visceral area
	AUDd	Dorsal auditory area
	AUDp	Primary auditory area
	AUDv	Ventral auditory area
	VISam	Anteromedial visual area
	VISl	Lateral visual area
	VISp	Primary visual area
	ACA	Anterior cingulate area
	ACA1	Anterior cingulate area, layer 1
	ACA2/3	Anterior cingulate area, layer 2/3
	ACA5	Anterior cingulate area, layer 5
	ACA6a	Anterior cingulate area, layer 6a
	ACA6b	Anterior cingulate area, layer 6b
	ACAd	Anterior cingulate area, dorsal part
	ACAd1	Anterior cingulate area, dorsal part, layer 1
	ACAd2/3	Anterior cingulate area, dorsal part, layer 2/3
	ACAd5	Anterior cingulate area, dorsal part, layer 5
	ACAd6a	Anterior cingulate area, dorsal part, layer 6a
	ACAd6b	Anterior cingulate area, dorsal part, layer 6b
	ACAv	Anterior cingulate area, ventral part
	ACAv1	Anterior cingulate area, ventral part, layer 1
	ACAv2/3	Anterior cingulate area, ventral part, layer 2/3
	ACAv5	Anterior cingulate area, ventral part, layer 5
	ACAv6a	Anterior cingulate area, ventral part, 6a
	ACAv6b	Anterior cingulate area, ventral part, 6b
	PL	Prelimbic area
	PL1	Prelimbic area, layer 1
	PL2	Prelimbic area, layer 2
	PL2/3	Prelimbic area, layer 2/3
	PL5	Prelimbic area, layer 5
	PL6a	Prelimbic area, layer 6a
	PL6b	Prelimbic area, layer 6b
	ILA	Infralimbic area
	ILA1	Infralimbic area, layer 1
	ILA2	Infralimbic area, layer 2
	ILA2/3	Infralimbic area, layer 2/3
	ILA5	Infralimbic area, layer 5
	ILA6a	Infralimbic area, layer 6a
	ILA6b	Infralimbic area, layer 6b
	ORB	Orbital area
	ORB1	Orbital area, layer 1
	ORB2/3	Orbital area, layer 2/3
	ORB5	Orbital area, layer 5
	ORB6a	Orbital area, layer 6a
	ORB6b	Orbital area, layer 6b
	ORBl	Orbital area, lateral part
	ORBl1	Orbital area, lateral part, layer 1
	ORBl2/3	Orbital area, lateral part, layer 2/3
	ORBl5	Orbital area, lateral part, layer 5
	ORBl6a	Orbital area, lateral part, layer 6a
	ORBl6b	Orbital area, lateral part, layer 6b
	ORBm	Orbital area, medial part
	ORBm1	Orbital area, medial part, layer 1
	ORBm2	Orbital area, medial part, layer 2
	ORBm2/3	Orbital area, medial part, layer 2/3
	ORBm5	Orbital area, medial part, layer 5
	ORBm6a	Orbital area, medial part, layer 6a
	ORBm6b	Orbital area, medial part, layer 6b
	ORBv	Orbital area, ventral part
	ORBvl	Orbital area, ventrolateral part
	ORBvl1	Orbital area, ventrolateral part, layer 1
	ORBvl2/3	Orbital area, ventrolateral part, layer 2/3
	ORBvl5	Orbital area, ventrolateral part, layer 5
	ORBvl6a	Orbital area, ventrolateral part, layer 6a
	ORBvl6b	Orbital area, ventrolateral part, layer 6b
	AI	Agranular insular area
	AId	Agranular insular area, dorsal part
	AId1	Agranular insular area, dorsal part, layer 1
	AId2/3	Agranular insular area, dorsal part, layer 2/3
	AId5	Agranular insular area, dorsal part, layer 5
	AId6a	Agranular insular area, dorsal part, layer 6a
	AId6b	Agranular insular area, dorsal part, layer 6b
	AIp	Agranular insular area, posterior part
	AIp1	Agranular insular area, posterior part, layer 1
	AIp2/3	Agranular insular area, posterior part, layer 2/3
	AIp5	Agranular insular area, posterior part, layer 5
	AIp6a	Agranular insular area, posterior part, layer 6a
	AIp6b	Agranular insular area, posterior part, layer 6b
	AIv	Agranular insular area, ventral part
	AIv1	Agranular insular area, ventral part, layer 1
	AIv2/3	Agranular insular area, ventral part, layer 2/3
	AIv5	Agranular insular area, ventral part, layer 5
	AIv6a	Agranular insular area, ventral part, layer 6a
	AIv6b	Agranular insular area, ventral part, layer 6b
	RSP	Retrosplenial area
	RSPagl	Retrosplenial area, lateral agranular part
	RSPv6a	Retrosplenial area, ventral part, layer 6a
	RSPv6b	Retrosplenial area, ventral part, layer 6b
	PTLp	Posterior parietal association areas
	PERI1	Perirhinal area, layer 1
	PERI2/3	Perirhinal area, layer 2/3
	PERI5	Perirhinal area, layer 5
	PERI6a	Perirhinal area, layer 6a
	PERI6b	Perirhinal area, layer 6b
	ECT	Ectorhinal area
	ECT1	Ectorhinal area/Layer 1
	ECT2/3	Ectorhinal area/Layer 2/3
	ECT5	Ectorhinal area/Layer 5
	ECT6a	Ectorhinal area/Layer 6a
	ECT6b	Ectorhinal area/Layer 6b
	OLF	Olfactory areas
	MOB	Main olfactory bulb
	AOB	Accessory olfactory bulb
	AONl	Anterior olfactory nucleus, lateral part
	AONm	Anterior olfactory nucleus, medial part
	AONpv	Anterior olfactory nucleus, posteroventral part
	TTd1-4	Taenia tecta, dorsal part, layers 1-4
	TTv	Taenia tecta, ventral part
	DPs	Dorsal peduncular area, superficial layer
	DPd	Dorsal peduncular area, deep layer
	PIR	Piriform area
	PIR1-3	Piriform area, layers 1-3
	PIR1	Piriform area, molecular layer
	PIR2	Piriform area, pyramidal layer
	PIR3	Piriform area, polymorph layer
	NLOT	Nucleus of the lateral olfactory tract
	NLOT1-3	Nucleus of the lateral olfactory tract, layers 1-3
	COA	Cortical amygdalar area
	COAa	Cortical amygdalar area, anterior part
	COApl1-3	Cortical amygdalar area, posterior part, lateral zone, layers 1-3
	PAA2	Piriform-amygdalar area, pyramidal layer
	PAA3	Piriform-amygdalar area, polymorph layer
	TR	Postpiriform transition area
	TR1-3	Postpiriform transition area, layers 1-3
	HPF	Hippocampal formation
	HIP	Hippocampal region
	CA	Ammon's horn
	CA1	Field CA1
	CA3	Field CA3
	DG	Dentate gyrus
	ENTl4	Entorhinal area, lateral part, layer 4
	ENTl4/5	Entorhinal area, lateral part, layer 4/5
	ENTl5	Entorhinal area, lateral part, layer 5
	ENTl5/6	Entorhinal area, lateral part, layer 5/6
	ENTl6a	Entorhinal area, lateral part, layer 6a
	ENTl6b	Entorhinal area, lateral part, layer 6b
	ENTm	Entorhinal area, medial part, dorsal zone
	PAR	Parasubiculum
	POST	Postsubiculum
	PRE	Presubiculum
	SUB	Subiculum
	SUBd	Subiculum, dorsal part
	SUBv	Subiculum, ventral part
	ProS	Prosubiculum
	ProS	Prosubiculum
	CTXsp	Cortical subplate
	6b	Layer 6b, isocortex
	CLA	Claustrum
	EP	Endopiriform nucleus
	EPd	Endopiriform nucleus, dorsal part
	EPv	Endopiriform nucleus, ventral part
	LA	Lateral amygdalar nucleus
	BLA	Basolateral amygdalar nucleus
	BLAa	Basolateral amygdalar nucleus, anterior part
	BLAp	Basolateral amygdalar nucleus, posterior part
	BLAv	Basolateral amygdalar nucleus, ventral part
	BMA	Basomedial amygdalar nucleus
	BMAa	Basomedial amygdalar nucleus, anterior part
	BMAp	Basomedial amygdalar nucleus, posterior part
	PA	Posterior amygdalar nucleus
	CNU	Cerebral nuclei
	STR	Striatum
	STRd	Striatum dorsal region
	CP	Caudoputamen
	STRv	Striatum ventral region
	ACB	Nucleus accumbens
	FS	Fundus of striatum
	OT	Olfactory tubercle
	isl	Islands of Calleja
	islm	Major island of Calleja
	OT1-3	Olfactory tubercle, layers 1-3
	LS	Lateral septal nucleus
	LSc	Lateral septal nucleus, caudal (caudodorsal) part
	LSr	Lateral septal nucleus, rostral (rostroventral) part
	LSv	Lateral septal nucleus, ventral part
	SF	Septofimbrial nucleus
	SH	Septohippocampal nucleus
	sAMY	Striatum-like amygdalar nuclei
	AAA	Anterior amygdalar area
	BA	Bed nucleus of the accessory olfactory tract
	CEA	Central amygdalar nucleus
	CEAc	Central amygdalar nucleus, capsular part
	CEAl	Central amygdalar nucleus, lateral part
	CEAm	Central amygdalar nucleus, medial part
	IA	Intercalated amygdalar nucleus
	MEA	Medial amygdalar nucleus
	MEAad	Medial amygdalar nucleus, anterodorsal part
	MEAav	Medial amygdalar nucleus, anteroventral part
	MEApd	Medial amygdalar nucleus, posterodorsal part
	MEApd-a	Medial amygdalar nucleus, posterodorsal part, sublayer a
	MEApd-b	Medial amygdalar nucleus, posterodorsal part, sublayer b
	MEApd-c	Medial amygdalar nucleus, posterodorsal part, sublayer c
	MEApv	Medial amygdalar nucleus, posteroventral part
	PAL	Pallidum
	PALd	Pallidum, dorsal region
	GPe	Globus pallidus, external segment
	GPi	Globus pallidus, internal segment
	PALv	Pallidum, ventral region
	SI	Substantia innominata
	MA	Magnocellular nucleus
	PALm	Pallidum, medial region
	MSC	Medial septal complex
	MS	Medial septal nucleus
	NDB	Diagonal band nucleus
	TRS	Triangular nucleus of septum
	PALc	Pallidum, caudal region
	BST	Bed nuclei of the stria terminalis
	BSTa	Bed nuclei of the stria terminalis, anterior division
	BSTal	Bed nuclei of the stria terminalis, anterior division, anterolateral area
	BSTam	Bed nuclei of the stria terminalis, anterior division, anteromedial area
	BSTdm	Bed nuclei of the stria terminalis, anterior division, dorsomedial nucleus
	BSTfu	Bed nuclei of the stria terminalis, anterior division, fusiform nucleus
	BSTju	Bed nuclei of the stria terminalis, anterior division, juxtacapsular nucleus
	BSTmg	Bed nuclei of the stria terminalis, anterior division, magnocellular nucleus
	BSTov	Bed nuclei of the stria terminalis, anterior division, oval nucleus
	BSTrh	Bed nuclei of the stria terminalis, anterior division, rhomboid nucleus
	BSTv	Bed nuclei of the stria terminalis, anterior division, ventral nucleus
	BSTp	Bed nuclei of the stria terminalis, posterior division
	BSTd	Bed nuclei of the stria terminalis, posterior division, dorsal nucleus
	BSTpr	Bed nuclei of the stria terminalis, posterior division, principal nucleus
	BSTif	Bed nuclei of the stria terminalis, posterior division, interfascicular nucleus
	BSTtr	Bed nuclei of the stria terminalis, posterior division, transverse nucleus
	BSTse	Bed nuclei of the stria terminalis, posterior division, strial extension
	BAC	Bed nucleus of the anterior commissure
	BS	Brain stem
	IB	Interbrain
	TH	Thalamus
	DORsm	Thalamus, sensory-motor cortex related
	VENT	Ventral group of the dorsal thalamus
	VAL	Ventral anterior-lateral complex of the thalamus
	VM	Ventral medial nucleus of the thalamus
	VP	Ventral posterior complex of the thalamus
	VPL	Ventral posterolateral nucleus of the thalamus
	VPLpc	Ventral posterolateral nucleus of the thalamus, parvicellular part
	VPM	Ventral posteromedial nucleus of the thalamus
	VPMpc	Ventral posteromedial nucleus of the thalamus, parvicellular part
	SPFm	Subparafascicular nucleus, magnocellular part
	SPFp	Subparafascicular nucleus, parvicellular part
	SPA	Subparafascicular area
	PP	Peripeduncular nucleus
	GENd	Geniculate group, dorsal thalamus
	MG	Medial geniculate complex
	MGd	Medial geniculate complex, dorsal part
	MGv	Medial geniculate complex, ventral part
	MGm	Medial geniculate complex, medial part
	LGd	Dorsal part of the lateral geniculate complex
	LGd-sh	Dorsal part of the lateral geniculate complex, shell
	LGd-co	Dorsal part of the lateral geniculate complex, core
	LGd-ip	Dorsal part of the lateral geniculate complex, ipsilateral zone
	DORpm	Thalamus, polymodal association cortex related
	LAT	Lateral group of the dorsal thalamus
	LP	Lateral posterior nucleus of the thalamus
	PO	Posterior complex of the thalamus
	POL	Posterior limiting nucleus of the thalamus
	SGN	Suprageniculate nucleus
	AM	Anteromedial nucleus
	AMd	Anteromedial nucleus, dorsal part
	AMv	Anteromedial nucleus, ventral part
	AD	Anterodorsal nucleus
	IAM	Interanteromedial nucleus of the thalamus
	IAD	Interanterodorsal nucleus of the thalamus
	LD	Lateral dorsal nucleus of thalamus
	MED	Medial group of the dorsal thalamus
	IMD	Intermediodorsal nucleus of the thalamus
	MD	Mediodorsal nucleus of thalamus
	MDc	Mediodorsal nucleus of the thalamus, central part
	MDl	Mediodorsal nucleus of the thalamus, lateral part
	MDm	Mediodorsal nucleus of the thalamus, medial part
	SMT	Submedial nucleus of the thalamus
	PR	Perireunensis nucleus
	MTN	Midline group of the dorsal thalamus
	PVT	Paraventricular nucleus of the thalamus
	PT	Parataenial nucleus
	RE	Nucleus of reuniens
	RH	Rhomboid nucleus
	CM	Central medial nucleus of the thalamus
	PCN	Paracentral nucleus
	CL	Central lateral nucleus of the thalamus
	PF	Parafascicular nucleus
	RT	Reticular nucleus of the thalamus
	GENv	Geniculate group, ventral thalamus
	IGL	Intergeniculate leaflet of the lateral geniculate complex
	IntG	Intermediate geniculate nucleus
	LGv	Ventral part of the lateral geniculate complex
	SubG	Subgeniculate nucleus
	MH	Medial habenula
	LH	Lateral habenula
	HY	Hypothalamus
	PVZ	Periventricular zone
	SO	Supraoptic nucleus
	ASO	Accessory supraoptic group
	PVH	Paraventricular hypothalamic nucleus
	PVHm	Paraventricular hypothalamic nucleus, magnocellular division
	PVHam	Paraventricular hypothalamic nucleus, magnocellular division, anterior magnocellular part
	PVHmm	Paraventricular hypothalamic nucleus, magnocellular division, medial magnocellular part
	PVHpm	Paraventricular hypothalamic nucleus, magnocellular division, posterior magnocellular part
	PVHpml	Paraventricular hypothalamic nucleus, magnocellular division, posterior magnocellular part, lateral zone
	PVHpmm	Paraventricular hypothalamic nucleus, magnocellular division, posterior magnocellular part, medial zone
	PVHp	Paraventricular hypothalamic nucleus, parvicellular division
	PVHap	Paraventricular hypothalamic nucleus, parvicellular division, anterior parvicellular part
	PVHmpd	Paraventricular hypothalamic nucleus, parvicellular division, medial parvicellular part, dorsal zone
	PVHpv	Paraventricular hypothalamic nucleus, parvicellular division, periventricular part
	PVa	Periventricular hypothalamic nucleus, anterior part
	PVi	Periventricular hypothalamic nucleus, intermediate part
	ARH	Arcuate hypothalamic nucleus
	PVR	Periventricular region
	ADP	Anterodorsal preoptic nucleus
	AHA	Anterior hypothalamic area
	AVP	Anteroventral preoptic nucleus
	AVPV	Anteroventral periventricular nucleus
	DMH	Dorsomedial nucleus of the hypothalamus
	DMHa	Dorsomedial nucleus of the hypothalamus, anterior part
	DMHp	Dorsomedial nucleus of the hypothalamus, posterior part
	DMHv	Dorsomedial nucleus of the hypothalamus, ventral part
	MEPO	Median preoptic nucleus
	MPO	Medial preoptic area
	OV	Vascular organ of the lamina terminalis
	PD	Posterodorsal preoptic nucleus
	PS	Parastrial nucleus
	PSCH	Suprachiasmatic preoptic nucleus
	PVp	Periventricular hypothalamic nucleus, posterior part
	PVpo	Periventricular hypothalamic nucleus, preoptic part
	SBPV	Subparaventricular zone
	SCH	Suprachiasmatic nucleus
	SFO	Subfornical organ
	VMPO	Ventromedial preoptic nucleus
	VLPO	Ventrolateral preoptic nucleus
	MEZ	Hypothalamic medial zone
	AHN	Anterior hypothalamic nucleus
	AHNa	Anterior hypothalamic nucleus, anterior part
	AHNc	Anterior hypothalamic nucleus, central part
	AHNd	Anterior hypothalamic nucleus, dorsal part
	AHNp	Anterior hypothalamic nucleus, posterior part
	MBO	Mammillary body
	LM	Lateral mammillary nucleus
	MM	Medial mammillary nucleus
	MMme	Medial mammillary nucleus, median part
	MMl	Medial mammillary nucleus, lateral part
	MMm	Medial mammillary nucleus, medial part
	MMp	Medial mammillary nucleus, posterior part
	MMd	Medial mammillary nucleus, dorsal part
	SUM	Supramammillary nucleus
	SUMl	Supramammillary nucleus, lateral part
	SUMm	Supramammillary nucleus, medial part
	TM	Tuberomammillary nucleus
	TMd	Tuberomammillary nucleus, dorsal part
	TMv	Tuberomammillary nucleus, ventral part
	MPN	Medial preoptic nucleus
	MPNc	Medial preoptic nucleus, central part
	MPNl	Medial preoptic nucleus, lateral part
	MPNm	Medial preoptic nucleus, medial part
	PMd	Dorsal premammillary nucleus
	PMv	Ventral premammillary nucleus
	PVHd	Paraventricular hypothalamic nucleus, descending division
	PVHdp	Paraventricular hypothalamic nucleus, descending division, dorsal parvicellular part
	PVHf	Paraventricular hypothalamic nucleus, descending division, forniceal part
	PVHlp	Paraventricular hypothalamic nucleus, descending division, lateral parvicellular part
	PVHmpv	Paraventricular hypothalamic nucleus, descending division, medial parvicellular part, ventral zone
	VMH	Ventromedial hypothalamic nucleus
	VMHa	Ventromedial hypothalamic nucleus, anterior part
	VMHc	Ventromedial hypothalamic nucleus, central part
	VMHdm	Ventromedial hypothalamic nucleus, dorsomedial part
	VMHvl	Ventromedial hypothalamic nucleus, ventrolateral part
	PH	Posterior hypothalamic nucleus
	LZ	Hypothalamic lateral zone
	LHA	Lateral hypothalamic area
	LPO	Lateral preoptic area
	PST	Preparasubthalamic nucleus
	PSTN	Parasubthalamic nucleus
	PeF	Perifornical nucleus
	RCH	Retrochiasmatic area
	STN	Subthalamic nucleus
	TU	Tuberal nucleus
	ZI	Zona incerta
	A13	Dopaminergic A13 group
	FF	Fields of Forel
	ME	Median eminence
	MB	Midbrain
	MBsen	Midbrain, sensory related
	SC	Superior colliculus
	IC	Inferior colliculus
	PRC	Precommissural nucleus
	OP	Olivary pretectal nucleus
	PPT	Posterior pretectal nucleus
	III	Oculomotor nucleus
	VTN	Ventral tegmental nucleus
	AT	Anterior tegmental nucleus
	LT	Lateral terminal nucleus of the accessory optic tract
	DT	Dorsal terminal nucleus of the accessory optic tract
	MT	Medial terminal nucleus of the accessory optic tract
	SNl	Substantia nigra, lateral part
	MBsta	Midbrain, behavioral state related
	SNc	Substantia nigra, compact part
	PPN	Pedunculopontine nucleus
	IF	Interfascicular nucleus raphe
	IPN	Interpeduncular nucleus
	PSV	Principal sensory nucleus of the trigeminal
	PB	Parabrachial nucleus
	KF	Koelliker-Fuse subnucleus
	PBl	Parabrachial nucleus, lateral division
	PBlc	Parabrachial nucleus, lateral division, central lateral part
	PBld	Parabrachial nucleus, lateral division, dorsal lateral part
	PBle	Parabrachial nucleus, lateral division, external lateral part
	PBls	Parabrachial nucleus, lateral division, superior lateral part
	PBlv	Parabrachial nucleus, lateral division, ventral lateral part
	PBm	Parabrachial nucleus, medial division
	PBme	Parabrachial nucleus, medial division, external medial part
	PBmm	Parabrachial nucleus, medial division, medial medial part
	PBmv	Parabrachial nucleus, medial division, ventral medial part
	SOC	Superior olivary complex
	POR	Superior olivary complex, periolivary region
	SOCm	Superior olivary complex, medial part
	SOCl	Superior olivary complex, lateral part
	P-mot	Pons, motor related
	B	Barrington's nucleus
	DTN	Dorsal tegmental nucleus
	LTN	Lateral tegmental nucleus
	PDTg	Posterodorsal tegmental nucleus
	PCG	Pontine central gray
	PG	Pontine gray
	PRNc	Pontine reticular nucleus, caudal part
	PRNv	Pontine reticular nucleus, ventral part
	SUT	Supratrigeminal nucleus
	TRN	Tegmental reticular nucleus
	V	Motor nucleus of trigeminal
	CS	Superior central nucleus raphe
	CSl	Superior central nucleus raphe, lateral part
	CSm	Superior central nucleus raphe, medial part
	LC	Locus ceruleus
	LDT	Laterodorsal tegmental nucleus
	NI	Nucleus incertus
	PRNr	Pontine reticular nucleus
	RPO	Nucleus raphe pontis
	SLC	Subceruleus nucleus
	SLD	Sublaterodorsal nucleus
	MY	Medulla
	MY-sen	Medulla, sensory related
	AP	Area postrema
	NTS	Nucleus of the solitary tract
	NTSce	Nucleus of the solitary tract, central part
	NTSco	Nucleus of the solitary tract, commissural part
	NTSge	Nucleus of the solitary tract, gelatinous part
	NTSl	Nucleus of the solitary tract, lateral part
	NTSm	Nucleus of the solitary tract, medial part
	AMB	Nucleus ambiguus
	DMX	Dorsal motor nucleus of the vagus nerve
	GRN	Gigantocellular reticular nucleus
	IO	Inferior olivary complex
	IRN	Intermediate reticular nucleus
	ISN	Inferior salivatory nucleus
	LRN	Lateral reticular nucleus
	MARN	Magnocellular reticular nucleus
	MDRN	Medullary reticular nucleus
	MDRNd	Medullary reticular nucleus, dorsal part
	MDRNv	Medullary reticular nucleus, ventral part
	PARN	Parvicellular reticular nucleus
	PAS	Parasolitary nucleus
	PGRN	Paragigantocellular reticular nucleus
	PGRNd	Paragigantocellular reticular nucleus, dorsal part
	PGRNl	Paragigantocellular reticular nucleus, lateral part
	PRP	Nucleus prepositus
	PPY	Parapyramidal nucleus
	PPYd	Parapyramidal nucleus, deep part
	PPYs	Parapyramidal nucleus, superficial part
	x	Nucleus x
	XII	Hypoglossal nucleus
	fiber tracts	fiber tracts
	von	vomeronasal nerve
	In	olfactory nerve
	onl	olfactory nerve layer of main olfactory bulb
	lot	lateral olfactory tract, body
	lotd	dorsal limb
	aolt	accessory olfactory tract
	aco	anterior commissure, olfactory limb
	och	optic chiasm
	opt	optic tract
	cvb	efferent cochleovestibular bundle
	vVIIIn	vestibular nerve
	cVIIIn	cochlear nerve
	tb	trapezoid body
	ll	lateral lemniscus
	cic	inferior colliculus commissure
	bic	brachium of the inferior colliculus
	ml	medial lemniscus
	scp	superior cerebelar peduncles
	dscp	superior cerebellar peduncle decussation
	fa	corpus callosum, anterior forceps
	ec	external capsule
	ee	corpus callosum, extreme capsule
	ccg	genu of corpus callosum
	fp	corpus callosum, posterior forceps
	ccr	corpus callosum, rostrum
	ccb	corpus callosum, body
	ccs	corpus callosum, splenium
	cst	corticospinal tract
	int	internal capsule
	cpd	cerebal peduncle
	py	pyramid
	pyd	pyramidal decussation
	cstc	corticospinal tract, crossed
	cstu	corticospinal tract, uncrossed
	im	internal medullary lamina of the thalamus
	mtc	middle thalamic commissure
	epsc	cerebral nuclei related
	pap	pallidothalamic pathway
	nst	nigrostriatal tract
	ntt	nigrothalamic fibers
	ptf	pallidotegmental fascicle
	snp	striatonigral pathway
	stf	subthalamic fascicle
	tsp	tectospinal pathway
	tspd	direct tectospinal pathway
	dtd	doral tegmental decussation
	tspc	crossed tectospinal pathway
	rust	rubrospinal tract
	vtd	ventral tegmental decussation
	rrt	rubroreticular tract
	ctb	central tegmental bundle
	rst	retriculospinal tract
	rstl	retriculospinal tract, lateral part
	rstm	retriculospinal tract, medial part
	vsp	vestibulospinal pathway
	mfbs	medial forebrain bundle system
	mfbc	cerebrum related
	amc	amygdalar capsule
	apd	ansa peduncularis
	act	anterior commissure, temporal limb
	cing	cingulum bundle
	fxs	fornix system
	alv	alveus
	df	dorsal fornix
	fi	fimbria
	fxprg	precommissural fornix, general
	db	precommissural fornix diagonal band
	fxpo	postcommissural fornix
	mct	medial corticohypothalamic tract
	fx	columns of the fornix
	hc	hippocampal commissures
	dhc	dorsal hippocampal commissure
	vhc	ventral hippocampal commissure
	per	perforant path
	ab	angular path
	lab	longitudinal association bundle
	st	stria terminalis
	stc	commissural branch of stria terminalis
	mfsbshy	hypothalamus related
	mfb	medial forebrain bundle
	vlt	ventrolateral hypothalamic tract
	poc	preoptic commissure
	sup	supraoptic commissures
	supa	supraoptic commissures, anterior
	supd	supraoptic commissures, dorsal
	supv	supraoptic commissures, ventral
	pmx	premammillary commissure
	smd	supramammillary decussation
	php	propriohypothalamic pathways
	phpd	propriohypothalamic pathways, dorsal
	phpl	propriohypothalamic pathways, lateral
	phpm	propriohypothalamic pathways, medial
	phpv	propriohypothalamic pathways, ventral
	pvbh	periventricular bundle of the hypothalamus
	mfbsma	mammillary related
	pm	principal mammillary tract
	mtt	mammillothalamic tract
	mtg	mammillotegmental tract
	mp	mammillary peduncle
	mfbst	dorsal thalamus related
	pvbt	periventricular bundle of the thalamus
	mfbse	epithalamus related
	sm	stria medullaris
	fr	fasciculus retroflexus
	hbc	habenular commissure
	dlf	dorsal longitudinal fascicle
	dtt	dorsal tegmental tract
	VS	ventricular systems
	VL	lateral ventricle
	RC	rhinocele
	SEZ	subependymal zone
	chpl	choroid plexus
	chfl	choroid fissure
	IVF	interventricular foramen
	V3	third ventricle
	AQ	cerebral aqueduct
	V4	fourth ventricle
	V4r	lateral recess
	c	central canal, spinal cord/medulla
	eg	endorhinal groove
	hf	hippocampal fissure
	rf	rhinal fissure
